# Supplementary material for: Shared Pathways Among Autism Candidate Genes Determined by Co-expression Network Analysis of the Developing Human Brain Transcriptome
Source: PubMed Central journal article supplement (PMC4644211; doi:10.1007/s12031-015-0641-3), 2015-09-23
Supplement: 12031_2015_641_MOESM1_ESM.pdf [file 12031_2015_641_MOESM1_ESM.pdf]

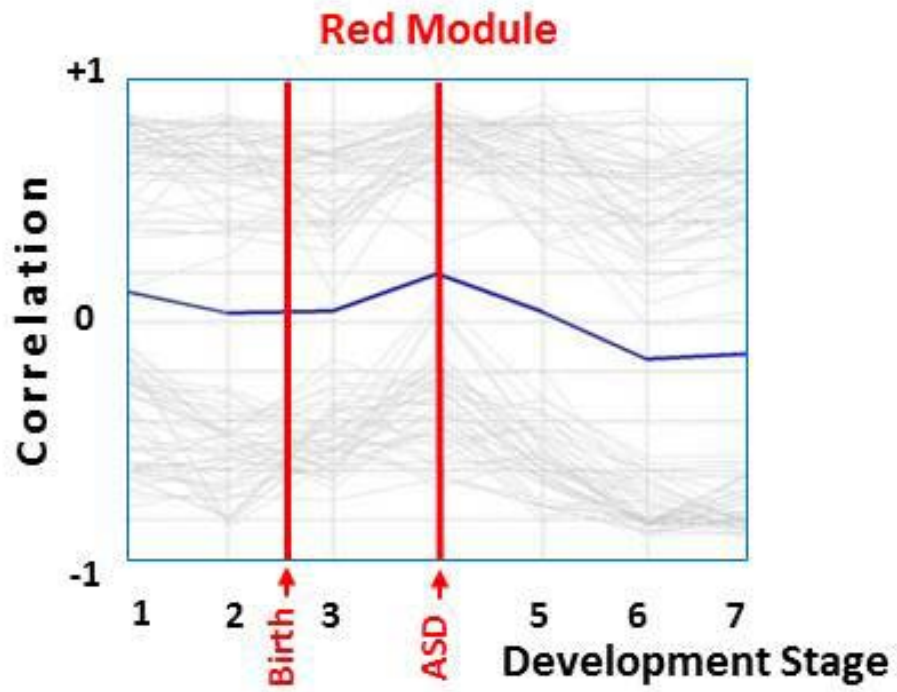

**Figure S1 | Red Module.** The average correlation pattern of gene-pairs in the red module does not show any coordinated pattern of expression across development. Red lines indicate birth and age on ASD diagnosis.
