# Supplementary material for: Shared Pathways Among Autism Candidate Genes Determined by Co-expression Network Analysis of the Developing Human Brain Transcriptome
Source: PubMed Central journal article supplement (PMC4644211; doi:10.1007/s12031-015-0641-3), 2015-09-23
Supplement: 12031_2015_641_MOESM2_ESM.pdf [file 12031_2015_641_MOESM2_ESM.pdf]

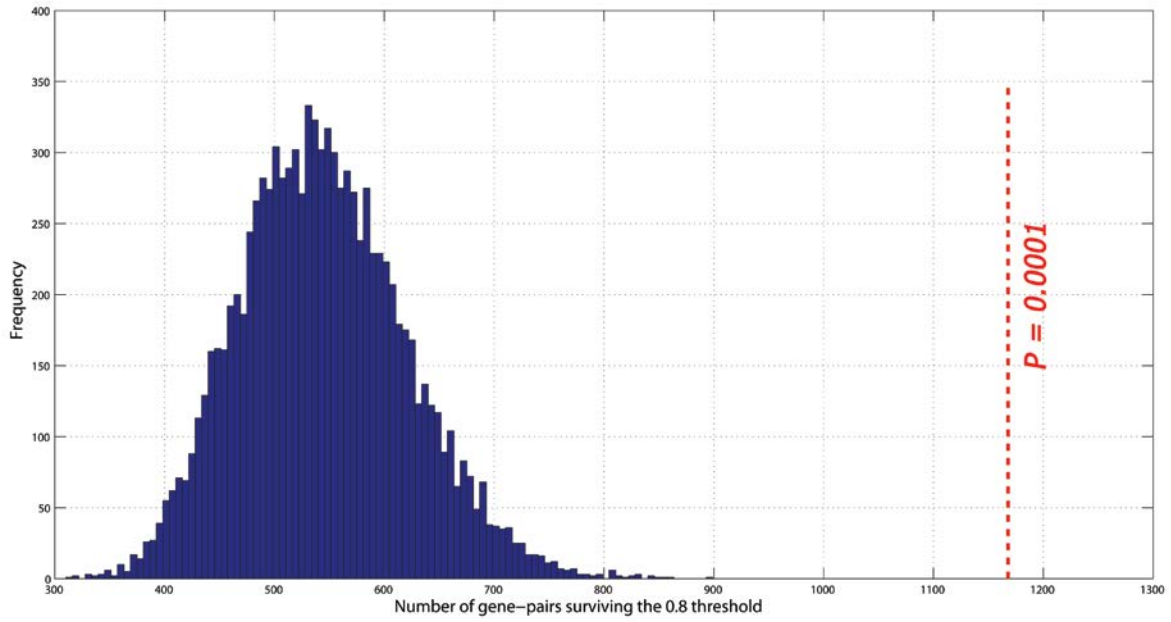

**Figure S2 | Distribution plot of the number of strongly correlated gene-pairs per gene set.** The distribution of the number of gene-pairs remaining after applying the threshold (absolute correlation > 0.8 at any developmental stage) shows that that the number of strongly correlated gene-pairs from the ASD list (dashed red line) is highly significant ( $p = 10^{-4}$ ). Blue bars correspond to the 10,000 random gene sets analyzed.
