# Supplementary material for: Shared Pathways Among Autism Candidate Genes Determined by Co-expression Network Analysis of the Developing Human Brain Transcriptome
Source: PubMed Central journal article supplement (PMC4644211; doi:10.1007/s12031-015-0641-3), 2015-09-23
Supplement: 12031_2015_641_MOESM3_ESM.pdf [file 12031_2015_641_MOESM3_ESM.pdf]

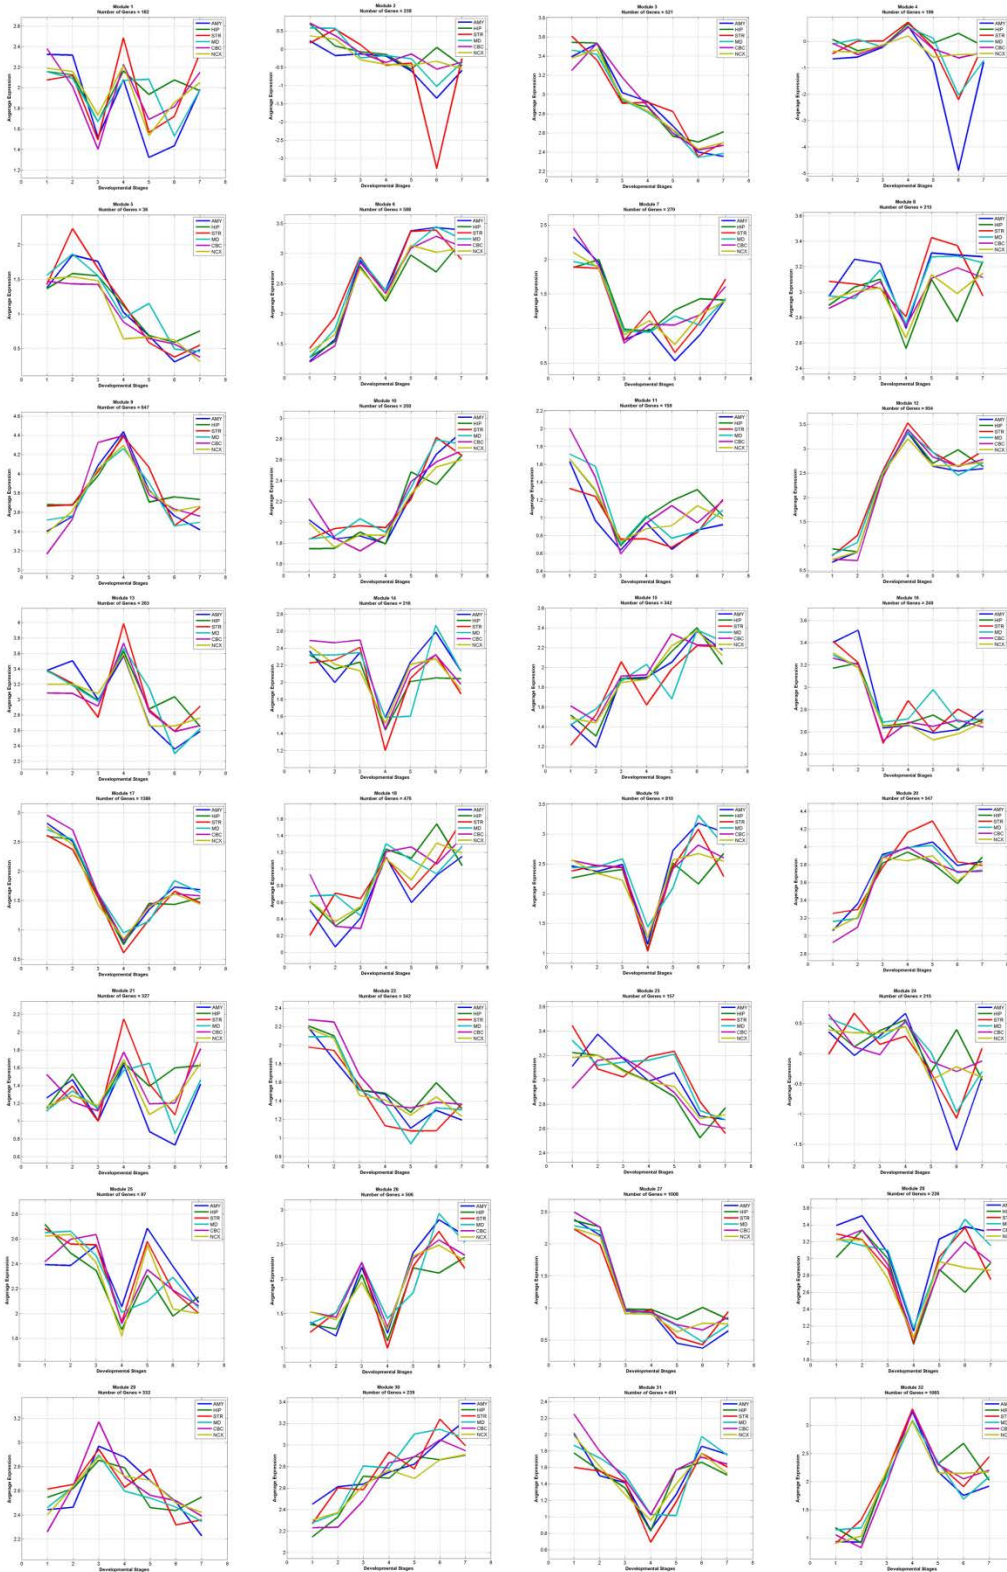

**Figure S3 | Average Expression Patterns of the 32 Molecular Interaction Networks.** Each graph shows the average expression pattern of all the genes within one of the 32 modules resulting from the transcriptome-wide co-expression network. Different colors represent different brain structures.
